# Supplementary material
Source: publisher site journal article supplement (https://www.spandidos-publications.com/8555/downloadSupplementary)
Supplement: Supplementary file 1 [file downloadSupplementary]

Table SI. Marker genes of cell types.

| Cell type      | Marker gene               |
|----------------|---------------------------|
| Epithelial     | EPCAM, KRT19, KRT18, CDH1 |
| Fibroblasts    | DCN, THY1, COL1A1, COL1A2 |
| Endothelial    | PECAM1, CLDN5, RAMP2      |
| T lymphocytes  | CD3D, CD3E, CD3G, TRAC    |
| Natural killer | GNLY, KLRD1               |
| B lymphocytes  | CD79A, IGHM, IGHG3, IGHA2 |
| Myeloid        | MARCO, CD68               |
| MAST           | KIT, MS4A2, GATA2         |

Table SII. Reaction system.

| Component                                    | Volume    |
|----------------------------------------------|-----------|
| cDNA                                         | 3 $\mu$ l |
| 2X Universal Blue SYBR Green qPCR Master Mix | 5 $\mu$ l |
| Forward primer (10 $\mu$ M)                  | 1 $\mu$ l |
| Reverse primer (10 $\mu$ M)                  | 1 $\mu$ l |

Table SIII. Prognostic gene-specific primers.

| Gene       | Primer (5'-3')         |
|------------|------------------------|
| IGSF10 F   | GAATCCTGATGCCCAAGCCAT  |
| IGSF10 R   | TAGGTCACAGGGCTGGTTCT   |
| ADRB1 F    | GCAATGTGCTGGTGATCGTG   |
| ADRB1 R    | CACAGCTCGCAGAAGAAGGA   |
| CA4 F      | ACCAAGGCAAAGGTGGACAA   |
| CA4 R      | GGCCAGTTCATTCTCCCGAT   |
| CACNA2D2 F | AAGACCAGCCTCAGAAGTGC   |
| CACNA2D2 R | CCTGGTCCCCTGATGGTTC    |
| GAPDH F    | CGAAGGTGGAGTCAACGGATTT |
| GAPDH R    | ATGGGTGGAATCATATTGGAAC |

GADPH was used as an internal reference. F, forward; R, reverse.
